# Supplementary material
Source: PubMed Central journal article supplement (PMC4913501)
Supplement: Supp_Fig1.pdf [file Supp_Fig1.pdf]

## Supplementary Data

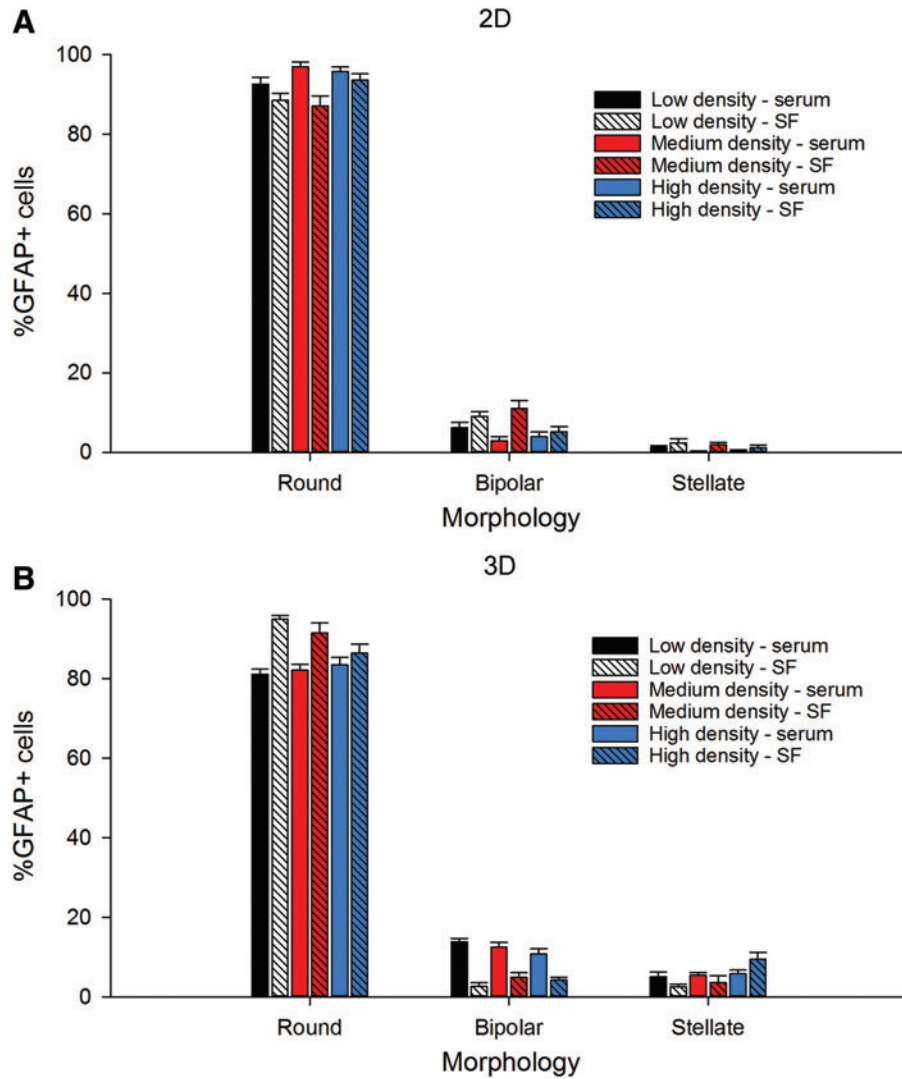

**SUPPLEMENTARY FIG. S1.** Distributions of GFAP<sup>+</sup> cells, varying dependent upon substrate. Distribution of GFAP<sup>+</sup> cells grown on 2D (A) or in 3D substrates (B) for 4 days at varying densities and medium serum content. The data are the same as in Figure 3, but presented to show overall morphologies. Data were analyzed with respect to the main factors of density and serum content, chi-square values are reported in the main text. 2D, two-dimensional; 3D, three-dimensional; GFAP, glial fibrillary acidic protein.
